# Supplementary material
Source: publisher site journal article supplement (https://www.dovepress.com/article/522756)
Supplement: Supplementary file 1 [file 522756%20Supplementary%20Material.pdf]

## SUPPLEMENTARY MATERIAL

### Real-World Disability Outcomes Among Patients Treated With Cariprazine vs Other Atypical Antipsychotics as Adjunctive Treatment for Major Depressive Disorder

Prakash S. Masand,<sup>1</sup> Mousam Parikh,<sup>2</sup> Jamie T. Ta,<sup>2</sup> Sally W. Wade,<sup>3</sup> Filmon Haile,<sup>2</sup> Susannah Ripley,<sup>4</sup> Enrico Zanardo,<sup>5</sup> Colleen S. Spencer,<sup>4</sup> François Laliberté,<sup>4</sup> Nadia Nabulsi<sup>2</sup>

1. Duke-NUS, Singapore
2. AbbVie, North Chicago, IL, USA
3. Wade Outcomes Research and Consulting, Salt Lake City, UT, USA
4. Groupe d'analyse, Ltée, Montréal, QC, Canada
5. Analysis Group, Inc., Denver, CO, USA
6. Duke-NUS, Singapore
7. AbbVie, North Chicago, IL, USA
8. Wade Outcomes Research and Consulting, Salt Lake City, UT, USA
9. Groupe d'analyse, Ltée, Montréal, QC, Canada
10. Analysis Group, Inc., Denver, CO, USA

**Supplementary Table 1. Atypical Antipsychotics and Antidepressant Therapies**

| Class                  | Description     | GPI code                 |
|------------------------|-----------------|--------------------------|
| Atypical antipsychotic | Aripiprazole    | 59250015                 |
| Atypical antipsychotic | Brexpiprazole   | 59250020                 |
| Atypical antipsychotic | Cariprazine     | 59400018                 |
| NDRI                   | Bupropion       | 58300040, 62100002       |
| SSRI                   | Citalopram      | 58160020                 |
| SSRI                   | Escitalopram    | 58160034, 5899850530B130 |
| SSRI                   | Fluoxetine      | 58160040, 62206040       |
| SSRI                   | Paroxetine      | 58160060, 62226060       |
| SSRI                   | Sertraline      | 58160070                 |
| SSRI                   | Vortioxetine    | 58120093                 |
| SNRI                   | Desvenlafaxine  | 58180020                 |
| SNRI                   | Duloxetine      | 58180025                 |
| SNRI                   | Levomilnacipran | 58180050                 |

|                                      |                                |                    |
|--------------------------------------|--------------------------------|--------------------|
| SNRI                                 | Venlafaxine                    | 58180090           |
| TCAs and tetracyclic antidepressants | Amitriptyline                  | 58200010           |
| TCAs and tetracyclic antidepressants | Amitriptyline/chlordiazepoxide | 62992002           |
| TCAs and tetracyclic antidepressants | Amoxapine                      | 58200020           |
| TCAs and tetracyclic antidepressants | Clomipramine                   | 58200025           |
| TCAs and tetracyclic antidepressants | Desipramine                    | 58200030           |
| TCAs and tetracyclic antidepressants | Doxepin                        | 58200040, 60400030 |
| TCAs and tetracyclic antidepressants | Imipramine                     | 58200050           |
| TCAs and tetracyclic antidepressants | Maprotiline                    | 58300010           |
| TCAs and tetracyclic antidepressants | Nortriptyline                  | 58200060           |
| TCAs and tetracyclic antidepressants | Protriptyline                  | 58200070           |
| TCAs and tetracyclic antidepressants | Trimipramine                   | 58200080           |
| MAOI                                 | Isocarboxazid                  | 58100010           |
| MAOI                                 | Phenelzine                     | 58100020           |
| MAOI                                 | Selegiline                     | 58100027           |
| MAOI                                 | Tranylcypromine                | 58100030           |
| Serotonin modulators                 | Nefazodone                     | 58120050           |
| Serotonin modulators                 | Trazodone                      | 58120080           |
| Serotonin modulators                 | Vilazodone                     | 58120088           |
| Other                                | Esketamine                     | 58110020           |
| Other                                | Fluvoxamine                    | 58160045           |

|       |             |          |
|-------|-------------|----------|
| Other | Mirtazapine | 58030050 |
|-------|-------------|----------|

GPI, generic product identifier; MAOI, monoamine oxidase inhibitor; NDRI, norepinephrine-dopamine reuptake inhibitor; SNRI, serotonin-norepinephrine reuptake inhibitor; SSRI, selective serotonin reuptake inhibitor; TCA: tricyclic antidepressant.

**Supplementary Table 2. List of ICD-10-CM Codes for Major Depressive Disorder**

| <b>Diagnosis Code</b> | <b>Description</b>                                                           |
|-----------------------|------------------------------------------------------------------------------|
| <i>F32</i>            | <i>Major depressive disorder, single episode</i>                             |
| F32.0                 | Major depressive disorder, single episode, mild                              |
| F32.1                 | Major depressive disorder, single episode, moderate                          |
| F32.2                 | Major depressive disorder, single episode, severe without psychotic features |
| F32.3                 | Major depressive disorder, single episode, severe with psychotic features    |
| F32.4                 | Major depressive disorder, single episode, in partial remission              |
| F32.5                 | Major depressive disorder, single episode, in full remission                 |
| F32.9                 | Major depressive disorder, single episode, unspecified                       |
| <i>F33</i>            | <i>Major depressive disorder, recurrent</i>                                  |
| F33.0                 | Major depressive disorder, recurrent, mild                                   |
| F33.1                 | Major depressive disorder, recurrent, moderate                               |
| F33.2                 | Major depressive disorder, recurrent severe without psychotic features       |
| F33.3                 | Major depressive disorder, recurrent, severe with psychotic symptoms         |
| F33.4                 | Major depressive disorder, recurrent, in remission                           |
| F33.40                | Major depressive disorder, recurrent, in remission, unspecified              |
| F33.41                | Major depressive disorder, recurrent, in partial remission                   |
| F33.42                | Major depressive disorder, recurrent, in full remission                      |
| F33.9                 | Major depressive disorder, recurrent, unspecified                            |

ICD-10-CM, *International Classification of Diseases, 10th Revision, Clinical Modification*.

**Supplementary Table 3. Baseline Demographics and Clinical Characteristics of Weighted and Unweighted Cohorts: Adjunctive Cariprazine vs Adjunctive Brexpiprazole**

| Characteristic                                                  | Unweighted cohorts             |                                  |                           | Weighted cohorts <sup>a</sup>  |                                  |                           |
|-----------------------------------------------------------------|--------------------------------|----------------------------------|---------------------------|--------------------------------|----------------------------------|---------------------------|
|                                                                 | Adjunctive cariprazine (n=224) | Adjunctive brexpiprazole (n=643) | Std diff <sup>b</sup> (%) | Adjunctive cariprazine (n=224) | Adjunctive brexpiprazole (n=643) | Std diff <sup>b</sup> (%) |
| <b>Length of follow-up period, mean (SD), mo</b>                | 3.9 (2.6)                      | 4.4 (2.6)                        | 19.8                      | 4.1 (2.6)                      | 4.4 (2.6)                        | 10.2                      |
| <b>Demographics</b>                                             |                                |                                  |                           |                                |                                  |                           |
| Age, mean (SD), y                                               | 44.0 (9.8)                     | 46.3 (9.6)                       | 23.0                      | 45.4 (9.5)                     | 45.7 (9.6)                       | 3.1                       |
| Female, n (%)                                                   | 140 (62.5)                     | 396 (61.6)                       | 1.9                       | 143 (63.7)                     | 398 (61.9)                       | 3.8                       |
| <b>Year of index date, n (%)</b>                                |                                |                                  |                           |                                |                                  |                           |
| 2017                                                            | 15 (6.7)                       | 107 (16.6)                       | 31.4                      | 26 (11.6)                      | 92 (14.4)                        | 8.3                       |
| 2018                                                            | 21 (9.4)                       | 143 (22.2)                       | 35.8                      | 38 (17.2)                      | 123 (19.1)                       | 5.1                       |
| 2019                                                            | 43 (19.2)                      | 110 (17.1)                       | 5.4                       | 36 (16.1)                      | 110 (17.2)                       | 2.9                       |
| 2020                                                            | 50 (22.3)                      | 81 (12.6)                        | 25.8                      | 37 (16.5)                      | 97 (15.1)                        | 4.1                       |
| 2021                                                            | 44 (19.6)                      | 94 (14.6)                        | 13.4                      | 41 (18.5)                      | 104 (16.1)                       | 6.2                       |
| 2022                                                            | 51 (22.8)                      | 108 (16.8)                       | 15.0                      | 45 (20.2)                      | 117 (18.1)                       | 5.2                       |
| <b>Geographic region, n (%)</b>                                 |                                |                                  |                           |                                |                                  |                           |
| South                                                           | 103 (46.0)                     | 316 (49.1)                       | 6.3                       | 106 (47.3)                     | 313 (48.6)                       | 2.5                       |
| Midwest                                                         | 76 (33.9)                      | 159 (24.7)                       | 20.3                      | 68 (30.3)                      | 176 (27.4)                       | 6.5                       |
| West                                                            | 26 (11.6)                      | 90 (14.0)                        | 7.2                       | 26 (11.4)                      | 83 (12.9)                        | 4.6                       |
| Northeast                                                       | 13 (5.8)                       | 63 (9.8)                         | 14.9                      | 17 (7.5)                       | 56 (8.7)                         | 4.5                       |
| Unknown                                                         | 6 (2.7)                        | 15 (2.3)                         | 2.2                       | 8 (3.4)                        | 15 (2.4)                         | 6.4                       |
| <b>Physician specialty at index,<sup>c</sup> n (%)</b>          |                                |                                  |                           |                                |                                  |                           |
| Primary care                                                    | 113 (50.4)                     | 191 (29.7)                       | 43.3                      | 81 (36.4)                      | 227 (35.2)                       | 2.4                       |
| MH specialist                                                   | 91 (40.6)                      | 406 (63.1)                       | 46.3                      | 125 (55.7)                     | 368 (57.2)                       | 3.1                       |
| Other provider type                                             | 18 (8.0)                       | 37 (5.8)                         | 9.0                       | 16 (7.4)                       | 40 (6.2)                         | 4.5                       |
| Missing                                                         | 2 (0.9)                        | 9 (1.4)                          | 4.8                       | 1 (0.6)                        | 9 (1.4)                          | 7.5                       |
| <b>Quan-CCI,<sup>d</sup> mean (SD)</b>                          | 0.38 (0.90)                    | 0.53 (1.04)                      | 14.8                      | 0.54 (1.21)                    | 0.49 (1.00)                      | 4.3                       |
| <b>Baseline MDD severity,<sup>d</sup> n (%)</b>                 |                                |                                  |                           |                                |                                  |                           |
| Severe                                                          | 57 (25.4)                      | 199 (30.9)                       | 12.3                      | 66 (29.7)                      | 193 (30.1)                       | 0.9                       |
| Moderate                                                        | 89 (39.7)                      | 263 (40.9)                       | 2.4                       | 91 (40.5)                      | 262 (40.7)                       | 0.4                       |
| Mild                                                            | 12 (5.4)                       | 38 (5.9)                         | 2.4                       | 12 (5.3)                       | 36 (5.6)                         | 1.5                       |
| Remission                                                       | 7 (3.1)                        | 23 (3.6)                         | 2.5                       | 9 (4.0)                        | 22 (3.4)                         | 2.9                       |
| Unspecified                                                     | 59 (26.3)                      | 120 (18.7)                       | 18.5                      | 46 (20.6)                      | 129 (20.1)                       | 1.0                       |
| <b>Baseline MH medication use,<sup>d,e</sup> n (%)</b>          |                                |                                  |                           |                                |                                  |                           |
| Adjunctive AAs (excluding index AA)                             | 97 (43.3)                      | 273 (42.5)                       | 1.7                       | 99 (44.1)                      | 274 (42.7)                       | 2.8                       |
| Mood stabilizer                                                 | 9 (4.0)                        | 6 (0.9)                          | 20.0                      | 5 (2.4)                        | 6 (0.9)                          | 11.6                      |
| Thyroid hormone                                                 | 2 (0.9)                        | 9 (1.4)                          | 4.8                       | 2 (0.8)                        | 8 (1.2)                          | 4.9                       |
| Other adjunctive and supportive therapies                       | 43 (19.2)                      | 108 (16.8)                       | 6.3                       | 35 (15.8)                      | 104 (16.2)                       | 1.2                       |
| <b>Other baseline supportive therapy use,<sup>d</sup> n (%)</b> |                                |                                  |                           |                                |                                  |                           |
| Benzodiazepines                                                 | 104 (46.4)                     | 354 (55.1)                       | 17.3                      | 119 (53.3)                     | 344 (53.5)                       | 0.4                       |
| Opioids                                                         | 80 (35.7)                      | 231 (35.9)                       | 0.4                       | 86 (38.6)                      | 235 (36.5)                       | 4.4                       |
| Stimulants                                                      | 56 (25.0)                      | 149 (23.2)                       | 4.3                       | 57 (25.4)                      | 152 (23.7)                       | 3.9                       |
| Treatments for sleep disturbances                               | 32 (14.3)                      | 126 (19.6)                       | 14.2                      | 47 (20.9)                      | 122 (19.0)                       | 4.6                       |
| Other                                                           | 6 (2.7)                        | 31 (4.8)                         | 11.3                      | 7 (3.3)                        | 31 (4.8)                         | 7.6                       |
| <b>Other baseline MH-related therapy,<sup>d</sup> n (%)</b>     |                                |                                  |                           |                                |                                  |                           |
| Psychotherapy                                                   | 129 (57.6)                     | 467 (72.6)                       | 32.0                      | 152 (67.8)                     | 445 (69.2)                       | 3.0                       |
| Psychiatric diagnostic evaluation                               | 96 (42.9)                      | 327 (50.9)                       | 16.1                      | 101 (45.0)                     | 313 (48.6)                       | 7.2                       |

|                                                                        |                   |                   |      |                   |                   |      |
|------------------------------------------------------------------------|-------------------|-------------------|------|-------------------|-------------------|------|
| TMS                                                                    | 3 (1.3)           | 22 (3.4)          | 13.7 | 5 (2.3)           | 20 (3.1)          | 4.5  |
| Psychological and neuropsychological assessment and testing            | 2 (0.9)           | 13 (2.0)          | 9.4  | 3 (1.1)           | 12 (1.8)          | 5.7  |
| ECT                                                                    | 1 (0.4)           | 2 (0.3)           | 2.2  | 1 (0.5)           | 3 (0.5)           | 0.1  |
| <b>Baseline healthcare resource utilization,<sup>d</sup> mean (SD)</b> |                   |                   |      |                   |                   |      |
| <i>All-cause</i>                                                       |                   |                   |      |                   |                   |      |
| Hospitalizations                                                       | 0.25 (0.5)        | 0.19 (0.56)       | 11.2 | 0.21 (0.53)       | 0.22 (0.62)       | 1.2  |
| ED visits                                                              | 1.1 (1.9)         | 0.94 (1.79)       | 11.0 | 1.0 (1.7)         | 1.0 (2.0)         | 0.1  |
| Outpatient visits                                                      | 28.3 (24.8)       | 30.8 (20.7)       | 10.8 | 29.8 (24.1)       | 30.2 (21.0)       | 2.0  |
| <i>MH-related<sup>f</sup></i>                                          |                   |                   |      |                   |                   |      |
| Hospitalizations                                                       | 0.23 (0.56)       | 0.15 (0.51)       | 13.9 | 0.18 (0.49)       | 0.18 (0.55)       | 1.6  |
| ED visits                                                              | 0.33 (0.89)       | 0.25 (0.71)       | 9.4  | 0.26 (0.69)       | 0.27 (0.75)       | 1.0  |
| Outpatient visits                                                      | 18.0 (21.7)       | 18.2 (16.8)       | 1.1  | 19.0 (21.1)       | 17.9 (17.2)       | 5.5  |
| <b>Baseline healthcare costs,<sup>d,g</sup> mean (SD), 2022 USD</b>    |                   |                   |      |                   |                   |      |
| <i>All-cause</i>                                                       |                   |                   |      |                   |                   |      |
| Total healthcare costs (medical + pharmacy)                            | \$45,685 (72,835) | \$48,161 (83,490) | 3.2  | \$46,805 (71,014) | \$49,359 (86,517) | 3.2  |
| Medical costs                                                          | \$41,115 (71,568) | \$42,173 (81,155) | 1.4  | \$41,973 (69,624) | \$43,564 (34,284) | 2.1  |
| Hospitalization costs                                                  | \$11,199 (31,118) | \$9,555 (34,620)  | 5.0  | \$9,891 (29,583)  | \$10,602 (36,395) | 2.1  |
| ED visit costs                                                         | \$10,089 (20,616) | \$9,810 (22,574)  | 1.3  | \$9,848 (19,656)  | \$10,377 (23,798) | 2.4  |
| Outpatient visits costs                                                | \$19,826 (27,298) | \$22,808 (36,730) | 9.2  | \$22,234 (30,457) | \$22,586 (35,910) | 1.1  |
| Physician office visit costs                                           | \$19,048 (26,185) | \$22,055 (35,914) | 9.6  | \$21,311 (29,543) | \$21,827 (35,070) | 1.6  |
| Home health care visit costs                                           | \$3,333 (12,400)  | \$3,694 (12,816)  | 2.9  | \$3,999 (13,546)  | \$3,498 (12,363)  | 3.9  |
| Other outpatient visit costs                                           | \$7,235 (16,352)  | \$8,318 (21,238)  | 5.7  | \$8,308 (17,312)  | \$8,576 (21,659)  | 1.4  |
| Pharmacy costs                                                         | \$4,570 (12,026)  | \$5,988 (12,527)  | 11.6 | \$4,832 (12,595)  | \$5,795 (12,191)  | 7.8  |
| <i>MH-related<sup>f</sup></i>                                          |                   |                   |      |                   |                   |      |
| Total healthcare costs (medical + pharmacy)                            | \$37,404 (66,265) | \$37,475 (74,272) | 0.1  | \$37,433 (63,658) | \$39,087 (78,037) | 2.3  |
| Medical costs                                                          | \$35,980 (66,097) | \$35,625 (74,110) | 0.5  | \$35,921 (63,465) | \$37,246 (77,786) | 1.9  |
| Hospitalization costs                                                  | \$10,448 (29,317) | \$9,003 (33,568)  | 4.6  | \$9,128 (27,561)  | \$10,014 (35,381) | 2.8  |
| ED visit costs                                                         | \$9,390 (19,783)  | \$9,009 (21,509)  | 1.8  | \$9,252 (18,900)  | \$9,481 (22,482)  | 1.1  |
| Outpatient visit costs                                                 | \$16,141 (22,962) | \$17,614 (27,840) | 5.8  | \$17,541 (24,574) | \$17,750 (28,045) | 0.8  |
| Physician office visit costs                                           | \$15,972 (22,828) | \$17,467 (27,716) | 5.9  | \$17,286 (24,498) | \$17,599 (27,901) | 1.2  |
| Home health care visit costs                                           | \$2,934 (10,222)  | \$3,556 (12,519)  | 5.4  | \$3,609 (11,830)  | \$3,371 (12,085)  | 2.0  |
| Other outpatient visit costs                                           | \$7025 (16,136)   | \$7,835 (20,353)  | 4.4  | \$8,030 (17,029)  | \$8,081 (20,763)  | 0.3  |
| Pharmacy costs                                                         | \$1,424 (2,447)   | \$1,849 (3,470)   | 14.2 | \$1,512 (2,414)   | \$1,842 (3,422)   | 11.1 |

<sup>a</sup>Cohorts were weighted using IPTW based on propensity scores. Variables used in the propensity score calculation included age at index date, sex, geographic region, year of index date, physician specialty around index, baseline Quan-CCI score, baseline MDD severity, baseline MH-related therapy use, baseline other supportive therapy use,

other MH-related therapy used during baseline, baseline all-cause healthcare resource utilization (hospitalizations, ED visits, outpatient visits), baseline all-cause medical costs, and DSM-5 and Elixhauser comorbidities with std diffs >10% and a prevalence in cariprazine cohort  $\geq 5\%$ . The weight was trimmed at 99% of the distribution. Counts are rounded to the nearest integer, while percentages are calculated from continuous weighted values.

<sup>b</sup>For continuous variables, the std diff is calculated by dividing the absolute difference in means of the control and the case by the pooled SD of both groups. The pooled SD is the square root of the average of the squared SDs. For dichotomous variables, the std diff is calculated using the following equation where P is the respective proportion of participants in each group:  $|(\text{Pcase} - \text{Pcontrol})| / \sqrt{[(\text{Pcase}(1 - \text{Pcase}) + \text{Pcontrol}(1 - \text{Pcontrol})) / 2]}$ .

<sup>c</sup>Evaluated during the 45 days pre-index and 15 days post-index. MH specialists included psychiatrist, psychologist, psychiatric nurse, and child psychiatrist. Primary care physicians included family practice, internal medicine, pediatrician, hospitalist, multispecialty physician group, medical doctor, nursing services, and nurse practitioner. For patients with claims for both primary care physicians and MH specialists, physician type was classified as specialist. Patients with claims with a nonmissing provider type that did not belong to any of the other categories were classified as other provider type (not elsewhere classified).

<sup>d</sup>Evaluated during the 12-month baseline period, excluding the index date.

<sup>e</sup>Per study design, all patients were prescribed  $\geq 1$  ADT during the baseline period.

<sup>f</sup>MH-related HRU and costs were defined as visits with a primary or secondary MH diagnosis code.

<sup>g</sup>Costs were inflated to 2022 USD using the US Medical Care consumer price index from the Bureau of Labor Statistics from the US Department of Labor.

AA, atypical antipsychotic; ADT, antidepressant therapy; CCI, Charlson Comorbidity Index; DSM-5, *Diagnostic and Statistical Manual of Mental Disorders, 5th Edition*; ECT, electroconvulsive therapy; ED, emergency department; IPTW, inverse probability of treatment weighting; MDD, major depressive disorder; MH, mental health; std diff, standardized difference; TMS, transcranial magnetic stimulation; USD, US dollar.

**Supplementary Table 4. Baseline Comorbidities<sup>a</sup> of Weighted and Unweighted Cohorts: Adjunctive Cariprazine vs Adjunctive Brexpiprazole**

| Characteristic                                                                | Unweighted cohorts             |                                  |                           | Weighted cohorts <sup>c</sup>  |                                  |                           |
|-------------------------------------------------------------------------------|--------------------------------|----------------------------------|---------------------------|--------------------------------|----------------------------------|---------------------------|
|                                                                               | Adjunctive cariprazine (n=224) | Adjunctive brexpiprazole (n=643) | Std diff <sup>b</sup> (%) | Adjunctive cariprazine (n=224) | Adjunctive brexpiprazole (n=643) | Std diff <sup>b</sup> (%) |
| <b>DSM-5 comorbidities, n (%)</b>                                             |                                |                                  |                           |                                |                                  |                           |
| Anxiety disorders                                                             | 171 (76.3)                     | 469 (72.9)                       | 7.8                       | 172 (76.9)                     | 471 (73.3)                       | 8.3                       |
| Sleep-wake disorders                                                          | 89 (39.7)                      | 229 (35.6)                       | 8.5                       | 92 (40.9)                      | 221 (34.4)                       | 13.3                      |
| Trauma- and stressor-related disorders                                        | 62 (27.7)                      | 164 (25.5)                       | 4.9                       | 54 (24.3)                      | 169 (26.2)                       | 4.4                       |
| Bipolar and related disorders                                                 | 60 (26.8)                      | 68 (10.6)                        | 42.5                      | 36 (15.9)                      | 93 (14.4)                        | 4.2                       |
| Substance-related and addictive disorders                                     | 59 (26.3)                      | 120 (18.7)                       | 18.5                      | 44 (19.7)                      | 126 (19.5)                       | 0.3                       |
| Other conditions that may require a focus of clinical attention               | 44 (19.6)                      | 142 (22.1)                       | 6.0                       | 46 (20.6)                      | 147 (22.9)                       | 5.6                       |
| Breathing-related sleep disorder                                              | 42 (18.8)                      | 137 (21.3)                       | 6.4                       | 43 (19.2)                      | 131 (20.3)                       | 3.0                       |
| Obsessive-compulsive and related disorders                                    | 13 (5.8)                       | 37 (5.8)                         | 0.2                       | 14 (6.5)                       | 39 (6.0)                         | 1.9                       |
| Schizophrenia spectrum and other psychotic disorders                          | 10 (4.5)                       | 5 (0.8)                          | 23.2                      | 4 (1.6)                        | 8 (1.2)                          | 3.7                       |
| Feeding and eating disorders                                                  | 9 (4.0)                        | 19 (3.0)                         | 5.8                       | 7 (3.0)                        | 20 (3.2)                         | 0.9                       |
| Other mental disorders                                                        | 7 (3.1)                        | 22 (3.4)                         | 1.7                       | 4 (1.8)                        | 22 (3.5)                         | 10.2                      |
| Personality disorders                                                         | 6 (2.7)                        | 15 (2.3)                         | 2.2                       | 9 (4.2)                        | 17 (2.7)                         | 8.3                       |
| Parasomnia disorders                                                          | 6 (2.7)                        | 14 (2.2)                         | 3.3                       | 7 (3.0)                        | 14 (2.1)                         | 5.2                       |
| Neurocognitive disorders                                                      | 3 (1.3)                        | 15 (2.3)                         | 7.4                       | 1 (0.5)                        | 17 (2.6)                         | 16.9                      |
| Medication-induced movement disorders and other adverse effects of medication | 3 (1.3)                        | 6 (0.9)                          | 3.8                       | 2 (0.8)                        | 6 (1.0)                          | 1.5                       |
| Sexual dysfunctions                                                           | 1 (0.4)                        | 6 (0.9)                          | 5.9                       | 0 (0.2)                        | 6 (0.9)                          | 9.8                       |
| Somatic symptom and related disorders                                         | 0 (0.0)                        | 5 (0.8)                          | 12.5                      | 0 (0.0)                        | 5 (0.8)                          | 12.4                      |
| <b>Elixhauser comorbidities, n (%)</b>                                        |                                |                                  |                           |                                |                                  |                           |
| Hypertension                                                                  | 88 (39.3)                      | 243 (37.8)                       | 3.1                       | 85 (38.0)                      | 239 (37.2)                       | 1.7                       |
| Obesity                                                                       | 63 (28.1)                      | 152 (23.6)                       | 10.3                      | 52 (23.4)                      | 160 (24.9)                       | 3.6                       |
| Diabetes                                                                      | 37 (16.5)                      | 89 (13.8)                        | 7.5                       | 33 (14.8)                      | 90 (14.1)                        | 2.2                       |
| Drug abuse                                                                    | 33 (14.7)                      | 47 (7.3)                         | 23.9                      | 27 (12.1)                      | 50 (7.7)                         | 14.6                      |
| Chronic pulmonary disease                                                     | 32 (14.3)                      | 97 (15.1)                        | 2.3                       | 33 (14.6)                      | 96 (14.9)                        | 0.9                       |
| Hypothyroidism                                                                | 31 (13.8)                      | 108 (16.8)                       | 8.2                       | 40 (17.8)                      | 103 (16.0)                       | 4.7                       |
| Alcohol abuse                                                                 | 26 (11.6)                      | 66 (10.3)                        | 4.3                       | 17 (7.6)                       | 69 (10.7)                        | 10.6                      |
| Cardiac arrhythmias                                                           | 22 (9.8)                       | 61 (9.5)                         | 1.1                       | 18 (8.2)                       | 66 (10.3)                        | 7.2                       |
| Fluid and electrolyte disorders                                               | 17 (7.6)                       | 36 (5.6)                         | 8.0                       | 17 (7.8)                       | 36 (5.7)                         | 8.4                       |
| Rheumatoid arthritis/collagen vascular disease                                | 14 (6.3)                       | 49 (7.6)                         | 5.4                       | 15 (6.5)                       | 50 (7.7)                         | 4.6                       |
| Psychoses                                                                     | 10 (4.5)                       | 5 (0.8)                          | 23.2                      | 4 (1.6)                        | 8 (1.2)                          | 3.7                       |

|                                |          |          |      |         |          |      |
|--------------------------------|----------|----------|------|---------|----------|------|
| Deficiency anemias             | 10 (4.5) | 45 (7.0) | 10.9 | 7 (2.9) | 44 (6.8) | 18.1 |
| Liver disease                  | 9 (4.0)  | 38 (5.9) | 8.7  | 6 (2.7) | 34 (5.3) | 13.1 |
| Weight loss                    | 7 (3.1)  | 21 (3.3) | 0.8  | 7 (3.1) | 18 (2.8) | 1.4  |
| Other neurological disorder    | 6 (2.7)  | 34 (5.3) | 13.4 | 4 (1.8) | 37 (5.7) | 21.0 |
| Coagulopathy                   | 5 (2.2)  | 13 (2.0) | 1.5  | 3 (1.4) | 15 (2.3) | 6.7  |
| Valvular disease               | 4 (1.8)  | 24 (3.7) | 11.9 | 3 (1.1) | 24 (3.7) | 16.9 |
| Renal failure                  | 4 (1.8)  | 8 (1.2)  | 4.4  | 8 (3.5) | 7 (1.1)  | 15.8 |
| Peripheral vascular disorders  | 3 (1.3)  | 12 (1.9) | 4.2  | 2 (0.8) | 12 (1.9) | 9.3  |
| Solid tumor without metastasis | 3 (1.3)  | 20 (3.1) | 12.0 | 8 (3.4) | 18 (2.8) | 3.6  |
| Blood loss anemia              | 3 (1.3)  | 11 (1.7) | 3.0  | 2 (0.8) | 14 (2.1) | 10.8 |
| Congestive heart failure       | 2 (0.9)  | 10 (1.6) | 6.0  | 2 (0.9) | 9 (1.3)  | 4.4  |
| HIV/AIDS                       | 2 (0.9)  | 3 (0.5)  | 5.2  | 4 (1.8) | 3 (0.4)  | 13.2 |
| Metastatic cancer              | 1 (0.4)  | 3 (0.5)  | 0.3  | 4 (1.6) | 3 (0.5)  | 11.1 |
| Peptic ulcer disease           | 1 (0.4)  | 4 (0.6)  | 2.4  | 1 (0.3) | 4 (0.6)  | 4.8  |
| Pulmonary circulation disorder | 0 (0.0)  | 3 (0.5)  | 9.7  | 0 (0.0) | 3 (0.4)  | 9.5  |
| Paralysis                      | 0 (0.0)  | 3 (0.5)  | 9.7  | 0 (0.0) | 4 (0.6)  | 11.2 |

<sup>a</sup>Evaluated during the 12-month baseline period, excluding the index date.

<sup>b</sup>For continuous variables, the std diff is calculated by dividing the absolute difference in means of the control and the case by the pooled SD of both groups. The pooled SD is the square root of the average of the squared SDs. For dichotomous variables, the std diff is calculated using the following equation where P is the respective proportion of participants in each group:  $|(\text{Pcase} - \text{Pcontrol})| / \sqrt{[(\text{Pcase}(1 - \text{Pcase}) + \text{Pcontrol}(1 - \text{Pcontrol})) / 2]}$ .

<sup>c</sup>Cohorts were weighted using IPTW based on propensity scores. Variables used in the propensity score calculation included age at index date, sex, geographic region, year of index date, physician specialty around index, baseline Quan-CCI score, baseline MDD severity, baseline MH-related therapy use, baseline other supportive therapy use, other MH-related therapy used during baseline, baseline all-cause healthcare resource utilization (hospitalizations, ED visits, outpatient visits), baseline all-cause medical costs, and DSM-5 and Elixhauser comorbidities with std diffs >10% and a prevalence in cariprazine cohort  $\geq 5\%$ . The weight was trimmed at 99% of the distribution. Counts are rounded to the nearest integer, while percentages are calculated from continuous weighted values.

CCI, Charlson Comorbidity Index; DSM-5, *Diagnostic and Statistical Manual of Mental Disorders, 5th Edition*; ED, emergency department; IPTW, inverse probability of treatment weighting; MDD, major depressive disorder; MH, mental health; std diff, standardized difference.

**Supplementary Table 5. Baseline Demographics and Clinical Characteristics of Weighted and Unweighted Cohorts: Adjunctive Cariprazine vs Adjunctive Aripiprazole**

| Characteristic                                                   | Unweighted cohorts             |                                  |                           | Weighted cohorts <sup>a</sup>  |                                  |                           |
|------------------------------------------------------------------|--------------------------------|----------------------------------|---------------------------|--------------------------------|----------------------------------|---------------------------|
|                                                                  | Adjunctive cariprazine (n=174) | Adjunctive aripiprazole (n=2931) | Std diff <sup>b</sup> (%) | Adjunctive cariprazine (n=174) | Adjunctive aripiprazole (n=2931) | Std diff <sup>b</sup> (%) |
| <b>Length of follow-up period, mean (SD), mo.</b>                | 4.0 (2.6)                      | 4.5 (2.7)                        | 19.0                      | 4.1 (2.7)                      | 4.5 (2.7)                        | 12.4                      |
| <b>Demographics</b>                                              |                                |                                  |                           |                                |                                  |                           |
| Age, mean (SD), y                                                | 43.9 (10.0)                    | 44.1 (10.6)                      | 1.4                       | 44.3 (10.1)                    | 44.1 (10.5)                      | 2.4                       |
| Female, n (%)                                                    | 103 (59.2)                     | 1844 (62.9)                      | 7.6                       | 111 (63.8)                     | 1840 (62.8)                      | 2.2                       |
| <b>Year of index date, n (%)</b>                                 |                                |                                  |                           |                                |                                  |                           |
| 2017                                                             | 11 (6.3)                       | 591 (20.2)                       | 41.7                      | 20 (11.3)                      | 569 (19.4)                       | 22.6                      |
| 2018                                                             | 18 (10.3)                      | 532 (18.2)                       | 22.5                      | 23 (13.1)                      | 519 (17.7)                       | 12.6                      |
| 2019                                                             | 36 (20.7)                      | 483 (16.5)                       | 10.8                      | 34 (19.5)                      | 490 (16.7)                       | 7.2                       |
| 2020                                                             | 39 (22.4)                      | 455 (15.5)                       | 17.6                      | 36 (20.6)                      | 467 (15.9)                       | 12.4                      |
| 2021                                                             | 32 (18.4)                      | 448 (15.3)                       | 8.3                       | 31 (17.7)                      | 453 (15.4)                       | 5.7                       |
| 2022                                                             | 38 (21.8)                      | 422 (14.4)                       | 19.4                      | 31 (17.7)                      | 434 (14.8)                       | 8.1                       |
| <b>Region, n (%)</b>                                             |                                |                                  |                           |                                |                                  |                           |
| South                                                            | 80 (46.0)                      | 1221 (41.7)                      | 8.7                       | 82 (47.1)                      | 1231 (42.0)                      | 10.4                      |
| Midwest                                                          | 61 (35.1)                      | 790 (27.0)                       | 17.6                      | 53 (30.6)                      | 804 (27.4)                       | 7.0                       |
| West                                                             | 21 (12.1)                      | 546 (18.6)                       | 18.3                      | 24 (14.1)                      | 535 (18.3)                       | 11.4                      |
| Northeast                                                        | 6 (3.4)                        | 333 (11.4)                       | 30.6                      | 9 (4.9)                        | 320 (10.9)                       | 22.2                      |
| Unknown                                                          | 6 (3.4)                        | 41 (1.4)                         | 13.4                      | 6 (3.3)                        | 41 (1.4)                         | 12.3                      |
| <b>Physician specialty at index, <sup>c</sup> n (%)</b>          |                                |                                  |                           |                                |                                  |                           |
| Primary care                                                     | 89 (51.1)                      | 1050 (35.8)                      | 31.3                      | 77 (44.3)                      | 1073 (36.6)                      | 15.6                      |
| MH specialist                                                    | 71 (40.8)                      | 1649 (56.3)                      | 31.3                      | 80 (46.2)                      | 1624 (55.4)                      | 18.5                      |
| Other provider type                                              | 12 (6.9)                       | 204 (7.0)                        | 0.3                       | 14 (7.9)                       | 205 (7.0)                        | 3.4                       |
| Missing                                                          | 2 (1.1)                        | 28 (1.0)                         | 1.9                       | 3 (1.6)                        | 29 (1.0)                         | 5.9                       |
| <b>Quan-CCI, <sup>d</sup> mean (SD)</b>                          | 0.45 (0.98)                    | 0.46 (0.97)                      | 0.4                       | 0.44 (1.01)                    | 0.46 (0.97)                      | 1.4                       |
| <b>Baseline MDD severity, <sup>d</sup> n (%)</b>                 |                                |                                  |                           |                                |                                  |                           |
| Severe                                                           | 44 (25.3)                      | 858 (29.3)                       | 9.0                       | 45 (25.7)                      | 851 (29.0)                       | 7.4                       |
| Moderate                                                         | 65 (37.4)                      | 1091 (37.2)                      | 0.3                       | 63 (36.5)                      | 1094 (37.3)                      | 1.7                       |
| Mild                                                             | 11 (6.3)                       | 189 (6.4)                        | 0.5                       | 11 (6.1)                       | 188 (6.4)                        | 1.4                       |
| Remission                                                        | 7 (4.0)                        | 131 (4.5)                        | 6.8                       | 10 (5.6)                       | 131 (4.5)                        | 5.3                       |
| Unspecified                                                      | 47 (27.0)                      | 662 (22.6)                       | 0.7                       | 45 (26.1)                      | 668 (22.8)                       | 7.7                       |
| <b>Baseline MH-related therapy use<sup>d,e</sup> n (%)</b>       |                                |                                  |                           |                                |                                  |                           |
| Adjunctive AAs (excluding index AA)                              | 60 (34.5)                      | 383 (13.1)                       | 52.0                      | 35 (20.4)                      | 417 (14.2)                       | 16.2                      |
| Mood stabilizer                                                  | 7 (4.0)                        | 33 (1.1)                         | 18.4                      | 2 (1.2)                        | 37 (1.3)                         | 0.2                       |
| Thyroid hormone                                                  | 3 (1.7)                        | 37 (1.3)                         | 3.8                       | 2 (1.1)                        | 37 (1.3)                         | 1.9                       |
| Other adjunctive therapies                                       | 28 (16.1)                      | 441 (15.0)                       | 2.9                       | 24 (14.0)                      | 443 (15.1)                       | 3.2                       |
| <b>Other baseline supportive therapy use, <sup>d</sup> n (%)</b> |                                |                                  |                           |                                |                                  |                           |
| Benzodiazepines                                                  | 87 (50.0)                      | 1384 (47.2)                      | 5.6                       | 87 (49.9)                      | 1389 (47.4)                      | 5.0                       |
| Opioids                                                          | 64 (36.8)                      | 1043 (35.6)                      | 2.5                       | 63 (36.5)                      | 1048 (35.8)                      | 1.5                       |
| Stimulants                                                       | 43 (24.7)                      | 430 (14.7)                       | 25.5                      | 38 (21.8)                      | 445 (15.2)                       | 17.1                      |
| Treatments for sleep disturbances                                | 22 (12.6)                      | 367 (12.5)                       | 0.4                       | 20 (11.4)                      | 369 (12.6)                       | 3.6                       |
| Other                                                            | 5 (2.9)                        | 69 (2.4)                         | 3.3                       | 7 (3.9)                        | 71 (2.4)                         | 8.3                       |
| <b>Other baseline MH-related therapy, <sup>d</sup> n (%)</b>     |                                |                                  |                           |                                |                                  |                           |
| Psychotherapy                                                    | 99 (56.9)                      | 1814 (61.9)                      | 10.2                      | 99 (56.7)                      | 1806 (61.6)                      | 9.9                       |
| Psychiatric diagnostic evaluation                                | 79 (45.4)                      | 1413 (48.2)                      | 5.6                       | 75 (43.3)                      | 1406 (48.0)                      | 9.5                       |

|                                                                        |                   |                    |      |                   |                    |      |
|------------------------------------------------------------------------|-------------------|--------------------|------|-------------------|--------------------|------|
| TMS                                                                    | 2 (1.1)           | 20 (0.7)           | 4.9  | 1 (0.4)           | 20 (0.7)           | 4.2  |
| Psychological and neuropsychological assessment and testing            | 1 (0.6)           | 46 (1.6)           | 9.7  | 1 (0.4)           | 46 (1.6)           | 12.1 |
| ECT                                                                    | 1 (0.6)           | 12 (0.4)           | 2.4  | 2 (1.1)           | 12 (0.4)           | 8.2  |
| <b>Baseline healthcare resource utilization,<sup>d</sup> mean (SD)</b> |                   |                    |      |                   |                    |      |
| <i>All-cause</i>                                                       |                   |                    |      |                   |                    |      |
| Hospitalizations                                                       | 0.25 (0.64)       | 0.26 (0.63)        | 1.4  | 0.25 (0.65)       | 0.26 (0.63)        | 1.6  |
| ED visits                                                              | 1.1 (1.9)         | 1.1 (1.9)          | 0.6  | 1.1 (1.9)         | 1.1 (1.9)          | 3.2  |
| Outpatient visits                                                      | 28.2 (24.8)       | 26.2 (21.1)        | 8.5  | 26.5 (25.8)       | 26.3 (21.4)        | 0.7  |
| <i>MH-related<sup>f</sup></i>                                          |                   |                    |      |                   |                    |      |
| Hospitalizations                                                       | 0.22 (0.60)       | 0.22 (0.57)        | 1.1  | 0.21 (0.59)       | 0.22 (0.57)        | 1.5  |
| ED visits                                                              | 0.30 (0.89)       | 0.32 (0.88)        | 2.7  | 0.26 (0.81)       | 0.32 (0.88)        | 7.4  |
| Outpatient visits                                                      | 17.5 (22.3)       | 14.3 (16.1)        | 16.6 | 16.9 (23.4)       | 14.3 (16.1)        | 13.0 |
| <b>Baseline healthcare costs,<sup>d,g</sup> mean (SD), 2022 USD</b>    |                   |                    |      |                   |                    |      |
| <i>All-cause</i>                                                       |                   |                    |      |                   |                    |      |
| Total healthcare costs (medical + pharmacy)                            | \$49,387 (80,876) | \$58,702 (163,417) | 7.2  | \$51,059 (85,924) | \$58,210 (160,424) | 5.6  |
| Medical costs                                                          | \$43,672 (79,049) | \$53,635 (158,409) | 8.0  | \$46,665 (84,723) | \$53,099 (155,456) | 5.1  |
| Hospitalization costs                                                  | \$11,595 (32,790) | \$14,684 (63,870)  | 6.1  | \$12,834 (36,008) | \$14,514 (62,796)  | 3.3  |
| ED visit costs                                                         | \$11,192 (23,040) | \$12,840 (40,820)  | 5.0  | \$11,956 (24,968) | \$12,753 (40,141)  | 2.4  |
| Outpatient visits costs                                                | \$20,885 (29,789) | \$26,111 (65,909)  | 10.2 | \$21,875 (31,496) | \$25,832 (64,518)  | 7.8  |
| Physician office visit costs                                           | \$20,069 (28,493) | \$24,999 (63,207)  | 10.1 | \$20,829 (29,719) | \$24,724 (61,859)  | 8.0  |
| Home health care visit costs                                           | \$4557 (15,387)   | \$5488 (32,620)    | 3.6  | \$4325 (16,464)   | \$5467 (32,099)    | 4.5  |
| Other outpatient visit costs                                           | \$7433 (17,772)   | \$9482 (36,467)    | 7.1  | \$7315 (17,938)   | \$9425 (35,712)    | 7.5  |
| Pharmacy costs                                                         | \$5716 (13,658)   | \$5066 (30,683)    | 2.7  | \$4394 (10,773)   | \$5110 (30,465)    | 3.1  |
| <i>MH-related<sup>f</sup></i>                                          |                   |                    |      |                   |                    |      |
| Total healthcare costs (medical + pharmacy)                            | \$39,999 (71,661) | \$45,958 (135,436) | 5.5  | \$41,679 (76,795) | \$45,611 (132,976) | 3.6  |
| Medical costs                                                          | \$37,725 (71,623) | \$45,123 (135,377) | 6.8  | \$40,175 (76,691) | \$44,719 (132,918) | 4.2  |
| Hospitalization costs                                                  | \$10,751 (30,724) | \$13,238 (57,878)  | 5.4  | \$11,533 (33,020) | \$13,087 (56,826)  | 3.3  |
| ED visit costs                                                         | \$10,362 (21,937) | \$11,747 (39,259)  | 4.4  | \$11,145 (23,837) | \$11,666 (38,586)  | 1.6  |
| Outpatient visit costs                                                 | \$16,612 (24,225) | \$20,139 (46,715)  | 9.5  | \$17,496 (26,002) | \$19,966 (45,865)  | 6.6  |
| Physician office visit costs                                           | \$16,465 (24,126) | \$19,920 (46,587)  | 9.3  | \$17,315 (25,911) | \$19,739 (45,726)  | 6.5  |
| Home health care visit costs                                           | \$4093 (13,272)   | \$5018 (28,241)    | 4.2  | \$3648 (13,064)   | \$5008 (27,838)    | 6.3  |
| Other outpatient visit costs                                           | \$7228 (17,456)   | \$9054 (35,523)    | 6.5  | \$7127 (17,622)   | \$8997 (34,786)    | 6.8  |
| Pharmacy costs                                                         | \$2274 (4317)     | \$835 (2124)       | 42.3 | \$1504 (2946)     | \$892 (2250)       | 23.3 |

<sup>a</sup>Cohorts were weighted using IPTW based on propensity scores. Variables used in the propensity score calculation included age at index date, sex, geographic region, year of index date, physician specialty around index, baseline Quan-CCI score, baseline MDD severity, baseline MH-related therapy use, baseline other supportive therapy use,

other MH-related therapy used during baseline, baseline all-cause healthcare resource utilization (hospitalizations, ED visits, outpatient visits), baseline all-cause medical costs, and DSM-5 and Elixhauser comorbidities with std diffs >10% and a prevalence in cariprazine cohort  $\geq 5\%$ . The weight was trimmed at 99% of the distribution. Counts are rounded to the nearest integer, while percentages are calculated from continuous weighted values.

<sup>b</sup>For continuous variables, the std diff is calculated by dividing the absolute difference in means of the control and the case by the pooled SD of both groups. The pooled SD is the square root of the average of the squared SDs. For dichotomous variables, the std diff is calculated using the following equation where P is the respective proportion of participants in each group:  $|(P_{case} - P_{control})| / \sqrt{[(P_{case}(1 - P_{case}) + P_{control}(1 - P_{control})) / 2]}$ .

<sup>c</sup>Evaluated during the 45 days pre-index and 15 days post-index. MH specialists included psychiatrist, psychologist, psychiatric nurse, and child psychiatrist. Primary care physicians included family practice, internal medicine, pediatrician, hospitalist, multispecialty physician group, medical doctor, nursing services, and nurse practitioner. For patients with claims for both primary care physicians and MH specialists, physician type was classified as specialist. Patients with claims with a nonmissing provider type that did not belong to any of the other categories were classified as other provider type (not elsewhere classified).

<sup>d</sup>Evaluated during the 12-month baseline period, excluding the index date.

<sup>e</sup>Per study design, all patients were prescribed  $\geq 1$  ADT during the baseline period.

<sup>f</sup>MH-related HRU and costs were defined as visits with a primary or secondary MH diagnosis code.

<sup>g</sup>Costs were inflated to 2022 USD using the US Medical Care consumer price index from the Bureau of Labor Statistics from the US Department of Labor.

AA, atypical antipsychotic; ADT, antidepressant therapy; CCI, Charlson Comorbidity Index; DSM-5, *Diagnostic and Statistical Manual of Mental Disorders, 5th Edition*; ECT: electroconvulsive therapy; ED, emergency department; IPTW, inverse probability of treatment weighting; MDD, major depressive disorder; MH, mental health; std diff, standardized difference; TMS, transcranial magnetic stimulation; USD, US dollar.

**Supplementary Table 6. Baseline Comorbidities<sup>a</sup> of Weighted and Unweighted Cohorts: Adjunctive Cariprazine vs Adjunctive Aripiprazole**

| Characteristic                                                                | Unweighted cohorts             |                                  |                           | Weighted cohorts <sup>c</sup>  |                                  |                           |
|-------------------------------------------------------------------------------|--------------------------------|----------------------------------|---------------------------|--------------------------------|----------------------------------|---------------------------|
|                                                                               | Adjunctive cariprazine (n=174) | Adjunctive aripiprazole (n=2931) | Std diff <sup>b</sup> (%) | Adjunctive cariprazine (n=174) | Adjunctive aripiprazole (n=2931) | Std diff <sup>b</sup> (%) |
| <b>DSM-5 comorbidities, n (%)</b>                                             |                                |                                  |                           |                                |                                  |                           |
| Anxiety disorders                                                             | 131 (75.3)                     | 2182 (74.4)                      | 1.9                       | 127 (72.8)                     | 2188 (7406)                      | 4.3                       |
| Sleep-wake disorders                                                          | 71 (40.8)                      | 957 (32.7)                       | 17.0                      | 65 (37.1)                      | 969 (33.1)                       | 8.5                       |
| Bipolar and related disorders                                                 | 48 (27.6)                      | 280 (9.6)                        | 47.7                      | 25 (14.2)                      | 310 (10.6)                       | 11.1                      |
| Substance-related and addictive disorders                                     | 48 (27.6)                      | 580 (19.8)                       | 18.4                      | 41 (23.3)                      | 593 (20.2)                       | 7.5                       |
| Trauma- and stressor-related disorders                                        | 45 (25.9)                      | 740 (25.2)                       | 1.4                       | 42 (24.1)                      | 737 (25.1)                       | 2.4                       |
| Breathing-related sleep disorder                                              | 38 (21.8)                      | 471 (16.1)                       | 14.8                      | 29 (16.8)                      | 478 (16.3)                       | 1.4                       |
| Other conditions that may require a focus of clinical attention               | 31 (17.8)                      | 622 (21.2)                       | 8.6                       | 29 (16.8)                      | 617 (21.1)                       | 11.0                      |
| Obsessive-compulsive and related disorders                                    | 13 (7.5)                       | 103 (3.5)                        | 17.4                      | 9 (4.9)                        | 109 (3.7)                        | 5.8                       |
| Schizophrenia spectrum and other psychotic disorders                          | 7 (4.0)                        | 67 (2.3)                         | 10.0                      | 5 (2.6)                        | 69 (2.4)                         | 1.5                       |
| Other mental disorders                                                        | 6 (3.4)                        | 80 (2.7)                         | 4.2                       | 4 (2.5)                        | 80 (2.7)                         | 1.7                       |
| Feeding and eating disorders                                                  | 5 (2.9)                        | 66 (2.3)                         | 3.9                       | 7 (3.9)                        | 67 (2.3)                         | 9.5                       |
| Parasomnia disorders                                                          | 4 (2.3)                        | 73 (2.5)                         | 1.3                       | 3 (1.8)                        | 76 (2.6)                         | 5.1                       |
| Neurocognitive disorders                                                      | 4 (2.3)                        | 57 (1.9)                         | 2.5                       | 2 (1.2)                        | 58 (2.0)                         | 6.1                       |
| Personality disorders                                                         | 2 (1.1)                        | 70 (2.4)                         | 9.4                       | 2 (1.4)                        | 71 (2.4)                         | 7.7                       |
| Medication-induced movement disorders and other adverse effects of medication | 2 (1.1)                        | 16 (0.5)                         | 6.6                       | 2 (1.0)                        | 16 (0.5)                         | 5.1                       |
| Somatic symptom and related disorders                                         | 0 (0.0)                        | 33 (1.1)                         | 15.1                      | 0 (0.0)                        | 34 (1.2)                         | 15.3                      |
| <b>Elixhauser comorbidities, n (%)</b>                                        |                                |                                  |                           |                                |                                  |                           |
| Hypertension                                                                  | 63 (36.2)                      | 996 (34.0)                       | 4.7                       | 63 (36.1)                      | 998 (34.1)                       | 4.3                       |
| Obesity                                                                       | 49 (28.2)                      | 727 (24.8)                       | 7.6                       | 49 (28.2)                      | 731 (24.9)                       | 7.3                       |
| Drug abuse                                                                    | 28 (16.1)                      | 260 (8.9)                        | 22.0                      | 28 (16.2)                      | 265 (9.0)                        | 21.6                      |
| Chronic pulmonary disease                                                     | 26 (14.9)                      | 418 (14.3)                       | 1.9                       | 26 (14.7)                      | 417 (14.2)                       | 1.3                       |
| Hypothyroidism                                                                | 25 (14.4)                      | 398 (13.6)                       | 2.3                       | 29 (16.9)                      | 400 (13.6)                       | 9.1                       |
| Diabetes                                                                      | 25 (14.4)                      | 358 (12.2)                       | 6.3                       | 24 (13.7)                      | 362 (12.4)                       | 4.1                       |
| Alcohol abuse                                                                 | 22 (12.6)                      | 315 (10.7)                       | 5.9                       | 16 (9.2)                       | 320 (10.9)                       | 5.7                       |
| Cardiac arrhythmias                                                           | 20 (11.5)                      | 265 (9.0)                        | 8.1                       | 20 (11.8)                      | 270 (9.2)                        | 8.3                       |
| Fluid and electrolyte disorders                                               | 16 (9.2)                       | 204 (7.0)                        | 8.2                       | 14 (8.0)                       | 204 (6.9)                        | 4.2                       |
| Rheumatoid arthritis/collagen vascular disease                                | 14 (8.0)                       | 151 (5.2)                        | 11.7                      | 11 (6.3)                       | 156 (5.3)                        | 4.0                       |
| Deficiency anemias                                                            | 8 (4.6)                        | 179 (6.1)                        | 6.7                       | 7 (3.8)                        | 177 (6.1)                        | 10.2                      |
| Psychoses                                                                     | 7 (4.0)                        | 65 (2.2)                         | 10.4                      | 5 (2.6)                        | 67 (2.3)                         | 2.0                       |

|                                |         |           |     |         |           |      |
|--------------------------------|---------|-----------|-----|---------|-----------|------|
| Liver disease                  | 7 (4.0) | 147 (5.0) | 4.8 | 5 (3.0) | 148 (5.1) | 10.7 |
| Other neurologic disorder      | 6 (3.4) | 122 (4.2) | 3.7 | 3 (1.6) | 123 (4.2) | 15.5 |
| Weight loss                    | 5 (2.9) | 61 (2.1)  | 5.1 | 4 (2.5) | 64 (2.2)  | 2.3  |
| Coagulopathy                   | 4 (2.3) | 41 (1.4)  | 6.7 | 2 (1.2) | 40 (1.4)  | 1.7  |
| Renal failure                  | 4 (2.3) | 44 (1.5)  | 5.8 | 6 (3.5) | 44 (1.5)  | 12.8 |
| Congestive heart failure       | 3 (1.7) | 29 (1.0)  | 6.4 | 3 (1.6) | 29 (1.0)  | 5.1  |
| Solid tumor without metastasis | 3 (1.7) | 84 (2.9)  | 7.6 | 1 (0.8) | 82 (2.8)  | 14.9 |
| Peripheral vascular disorders  | 3 (1.7) | 41 (1.4)  | 2.6 | 3 (1.5) | 42 (1.4)  | 0.3  |
| Valvular disease               | 2 (1.1) | 66 (2.3)  | 8.5 | 3 (2.0) | 67 (2.3)  | 2.2  |
| HIV/AIDS                       | 2 (1.1) | 18 (0.6)  | 5.7 | 3 (1.6) | 18 (0.6)  | 9.3  |
| Peptic ulcer disease           | 1 (0.6) | 23 (0.8)  | 2.6 | 1 (0.8) | 23 (0.8)  | 0.2  |
| Blood loss anemia              | 1 (0.6) | 30 (1.0)  | 5.0 | 1 (0.4) | 30 (1.0)  | 7.6  |
| Metastatic cancer              | 1 (0.6) | 11 (0.4)  | 2.9 | 1 (0.7) | 11 (0.4)  | 5.1  |
| Paralysis                      | 0 (0.0) | 13 (0.4)  | 9.4 | 0 (0.0) | 13 (0.4)  | 9.5  |

<sup>a</sup>Evaluated during the 12-month baseline period, excluding the index date.

<sup>b</sup>For continuous variables, the std diff is calculated by dividing the absolute difference in means of the control and the case by the pooled SD of both groups. The pooled SD is the square root of the average of the squared SDs. For dichotomous variables, the std diff is calculated using the following equation where P is the respective proportion of participants in each group:  $|P_{case} - P_{control}| / \sqrt{[(P_{case}(1 - P_{case}) + P_{control}(1 - P_{control})) / 2]}$ .

<sup>c</sup>Cohorts were weighted using IPTW based on propensity scores. Variables used in the propensity score calculation included age at index date, sex, geographic region, year of index date, physician specialty around index, baseline Quan-CCI score, baseline MDD severity, baseline MH-related therapy use, baseline other supportive therapy use, other MH-related therapy used during baseline, baseline all-cause healthcare resource utilization (hospitalizations, ED visits, outpatient visits), baseline all-cause medical costs, and DSM-5 and Elixhauser comorbidities with std diffs >10% and a prevalence in cariprazine cohort  $\geq 5\%$ . The weight was trimmed at 99% of the distribution. Counts are rounded to the nearest integer, while percentages are calculated from continuous weighted values.

DSM-5, *Diagnostic and Statistical Manual of Mental Disorders, 5th Edition*; ED, emergency department; IPTW, inverse probability of treatment weighting; MDD, major depressive disorder; Std diff, standardized difference.
